# Supplementary material for: TRPV1 deletion impaired fracture healing and inhibited osteoclast and osteoblast differentiation
Source: PubMed Central journal article supplement (PMC5320507; doi:10.1038/srep42385), 2017-02-22
Supplement: srep42385-s1.pdf [file srep42385-s1.pdf]

1 **TRPV1 deletion impaired fracture healing and inhibited osteoclast**  
2 **and osteoblast differentiation**

3 Lin-Hai He<sup>1¶</sup>, Meng Liu<sup>1¶</sup>, Yang He<sup>1</sup>, E Xiao<sup>1</sup>, Lu Zhao<sup>1</sup>, Ting Zhang<sup>2</sup>,  
4 Hua-Qian Yang<sup>3</sup>, Yi Zhang<sup>1\*</sup>  
5

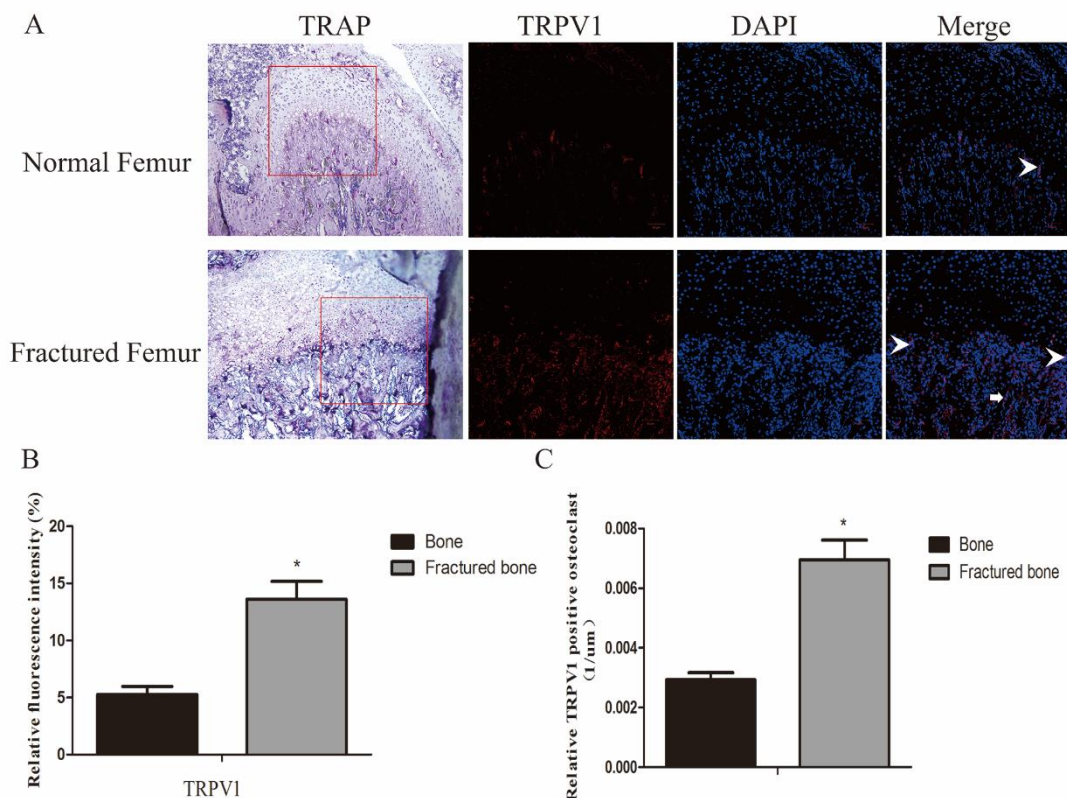

6

7 Supplemental figure 1 legend

8 TRPV1 expressions in bone and fracture healing. A: Left panel showed  
9 the TRAP staining. The rose color cells were TRAP-positive osteoclast.

10 The right panel showed the TRPV1 expression in bone and fractured  
11 bone by immunofluorescence. The white arrow heads shows the TRPV1  
12 positive osteoclast. The white arrow shows the bone lining cells. B: the

13 quantification results of TRPV1 immunofluorescence intensity analyzed

14 by Image J software. C: the quantification results of TRPV1 positive  
15 osteoclasts analyzed by BIOQUANT OSTEO Bone Biology Research  
16 System.  
17

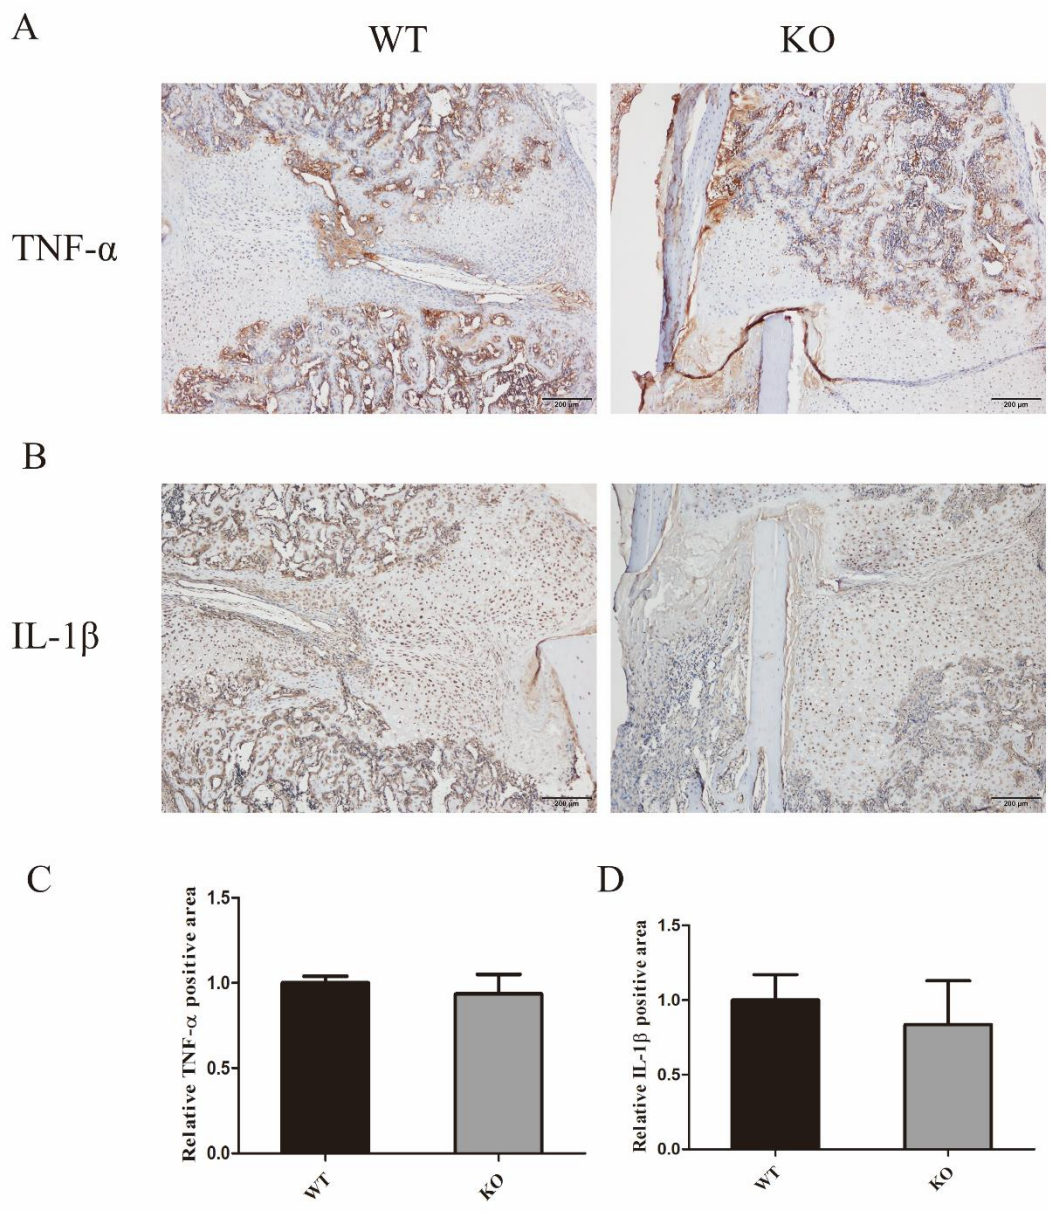

18  
19 Supplemental figure 2 legend  
20 Inflammation factors expression during fracture healing in WT and KO  
21 group. A: TNF- $\alpha$  expression in fracture callus detected by

22 immunohistochemistry staining. B: IL-1 $\beta$  expression in fracture callus  
23 detected by immunohistochemistry staining. C and D: quantification  
24 results of relative TNF- $\alpha$  and IL-1 $\beta$  positive area. No statistical differences  
25 of TNF- $\alpha$  and IL-1 $\beta$  expression between WT and KO group. \*= p <0.05
